# Supplementary material for: Complex Leadership in Healthcare: A Scoping Review
Source: PubMed Central journal article supplement (PMC6358662; doi:10.15171/ijhpm.2018.75), 2018-09-01
Supplement: ijhpm-7-1073-s002.pdf [file ijhpm-7-1073-s002.pdf]

**Supplementary file 2.** Complex Leadership Studies in Non-healthcare Settings and Reasons for Exclusion

| References to Excluded Papers                                                                                                                                                                  | Reason of Exclusion   |
|------------------------------------------------------------------------------------------------------------------------------------------------------------------------------------------------|-----------------------|
| Mendes M, Mendes M, Gomes C: Promoting learning and innovation in organizations through complexity leadership theory. Team Performance 2016.                                                   | Conceptual Paper      |
| Gilbert D, Shrieves L, Yearworth M: A Case Study of Applying Complexity Leadership Theory in Thales UK. Complex Systems Design \& 2016.                                                        | Engineering           |
| Anderson RJ, Adams WA: Book Highlight—Mastery and Maturity, Consciousness, and Complexity: The Leadership Development Agenda. Global Business and Organizational Excellence 2016, 35(4):76-87. | Conceptual Paper      |
| Yahaya M: Complexity of Leadership in the Context of Political Governance in Niger. In: Chaos, Complexity and Leadership 2013. ed.; 2015.                                                      | Public Administration |
| White BE: On Leadership in the Complex Adaptive Systems Engineering of Enterprise Transformation. Journal of Enterprise Transformation 2015.                                                   | Engineering           |
| Scholten P, Keskitalo ECH: Bottom-up initiatives toward climate change adaptation in cases in the Netherlands and the UK: a complexity leadership perspective. Environment and Planning 2015.  | Environment           |
| Santos DVB: Complexity leadership theory and its relation to team effectiveness: explicit coordination as a key mechanism. 2015.                                                               | Public Administration |
| Rose EJ: A case study in complexity leadership: Preparing baccalaureate nursing students. 2015.                                                                                                | Education             |
| Olalere A: Complexity and leadership crisis in Africa. International Journal of Public Leadership 2015.                                                                                        | Conceptual Paper      |

|                                                                                                                                                                                                         |                        |
|---------------------------------------------------------------------------------------------------------------------------------------------------------------------------------------------------------|------------------------|
| Niemandt CJP: Complex leadership as a way forward for transformational missional leadership in a denominational structure. HTS Theological Studies 2015.                                                | Religious organisation |
| Muthan VM: Using chaos and complexity theory to design robust leadership architecture for South African technology businesses. 2015.                                                                    | Industries             |
| Henriquez CMG: Adaptive Leadership and Social Movements, Applying The Complex Theory of Leadership. Proceedings of the 58th 2015.                                                                       | Social movement        |
| Hazy JK, Uhl-Bien M: Towards operationalizing complexity leadership: How generative, administrative and community-building leadership practices enact organizational outcomes. Leadership 2015.         | Conceptual Paper       |
| Gantasala PV: Complexity Leadership and Knowledge Management in Higher Education. World Academy of Science and Engineering 2015.                                                                        | Education              |
| Eric G F, Yvonne R: The Challenge of Leadership Throughout the Organizational Life Cycle. In: Building Sustainably Successful Organizations, Fifth Edition. ed.: John Wiley & Sons, Inc; 2015: 305-330. | Conceptual Paper       |
| Elkington R, Booysen L: Innovative Leadership as Enabling Function Within Organizations: A Complex Adaptive System Approach. Journal of Leadership Studies 2015, 9(3):78-80.                            | Conceptual Paper       |
| Davis H: Social complexity theory for sense seeking: Unearthing leadership mindsets for unknowable and uncertain times. Emergence: Complexity and Organization 2015.                                    | Conceptual Paper       |
| Cunha, C. J. C. D. A., Gunther, H. F. & Gramkow, F. B. 2015b. Leadership and Complexity : A Bibliometric Study. <i>Business and Management Review</i> , 4, 578-590.                                     | Bibliometric study     |
| Chace S: The Cuban Missile Crisis: Leadership as Disturbance, Informed by History. Journal of Leadership Studies 2015, 9(2):63-68.                                                                      | Law Enforcement        |

|                                                                                                                                                                                     |                       |
|-------------------------------------------------------------------------------------------------------------------------------------------------------------------------------------|-----------------------|
| Carter DR, DeChurch LA, Braun MT, Contractor NS: Social network approaches to leadership: an integrative conceptual review. The Journal of applied psychology 2015, 100(3):597-622. | Conceptual Paper      |
| Presley SP: How leaders engage in complexity leadership: Do action-logics make a difference? Fielding Graduate University 2014.                                                     | Industries            |
| Levanti G, Picone PM: The Role Of Complex Leadership In Interfirm Strategic Networks: Enabling Effect Versus Emergence. Academy of Management 2014.                                 | Industries            |
| Heaslip RJ: Leading Complex Endeavors. In: Managing Complex Projects and Programs. edn.: John Wiley & Sons, Inc.; 2014: 155-169.                                                    | Conceptual Paper      |
| Guarana CL, Hernandez M: Building sense out of situational complexity The role of ambivalence in creating functional leadership processes. Organizational Psychology Review 2014.   | Conceptual Paper      |
| Gregoire MB, Arendt SW: Leadership: reflections over the past 100 years. J Acad Nutr Diet 2014, 114(5 Suppl):S10-19.                                                                | Conceptual Paper      |
| Geer-Frazier B: Complexity leadership generates innovation, learning, and adaptation of the organization. Emergence: Complexity and Organization 2014.                              | Conceptual Paper      |
| Brown BC: Sane Leadership in a Crazy World: Essentials of Complexity Leadership. Academy meta-integral org 2014.                                                                    | Conceptual Paper      |
| Van Wart M: Lessons from Leadership Theory and the Contemporary Challenges of Leaders. Public Administration Review 2013, 73(4):553-565.                                            | Public Administration |
| O'Connor SJ: The complex world faced daily by health care executives and ideas and direction to effectively deal with this complexity. J Healthc Manag 2013, 58(6):387-388.         | Editorial             |
| Nooteboom SG, Termeer C: Strategies of complexity leadership in governance systems. International Review of Public 2013.                                                            | Environment           |

|                                                                                                                                                                                                        |                  |
|--------------------------------------------------------------------------------------------------------------------------------------------------------------------------------------------------------|------------------|
| Moerschell MBAL, Banner DK, Lao T, Singer T: Complexity Change Theory: Improvisational Leadership For Complex And Chaotic Environments. Leadership & Organizational Management Journal 2013, 13(1):24. | Conceptual Paper |
| Mason RB: Complexity Theory and Leadership for Turbulent Environments. J Soc Sci 2013.                                                                                                                 | Industries       |
| Lindstrom RR: Leadership needs to shift in the health system: three emerging perspectives to inform our way forward. Healthc Pap 2013, 13(1):48-54; discussion 78-82.                                  | Editorial        |
| Liang TY: Edge of emergence, relativistic complexity and the new leadership. Human Systems Management 2013.                                                                                            | Editorial        |
| Kowch EG: Conceptualising the essential qualities of complex adaptive leadership: networks that organise. Journal of Complexity in Leadership and in Management 2013.                                  | Conceptual Paper |
| Hudson DL: Attachment theory and leader-follower relationships. The Psychologist-Manager Journal 2013, 16(3):147-159.                                                                                  | Conceptual Paper |
| Hazy JK: Rethinking Complexity Leadership. In: 73rd Annual Meeting of the Academy of Management. 2013.                                                                                                 | Conference paper |
| Galbraith WS: The Complex Leadership Challenges of Joint Basing. 2013.                                                                                                                                 | Law Enforcement  |
| Curlee W, Gordon RL: Complexity and Program Management: leadership and complexity. In: Successful Project Management Strategies of Complexity edn.: John Wiley & Sons, Inc.; 2013: 103-115.            | Conceptual Paper |
| Clarke N: Model of complexity leadership development. Human Resource Development International 2013.                                                                                                   | Conceptual Paper |
| Booker R: Leadership of education psychological services: fit for purpose? Educ Psychol Pract 2013, 29(2):197-208.                                                                                     | Psychology       |
| Bento FC: Organizational complexity: leadership and change in research-intensive academic departments. Norwegian University of Science and Technology; 2013.                                           | Education        |
| Antoniadis D: Leadership Style and Socio-Organizational Complexity: Managing Its Effects. Business Systems Review 2013.                                                                                | Conceptual Paper |

|                                                                                                                                                                                                             |                  |
|-------------------------------------------------------------------------------------------------------------------------------------------------------------------------------------------------------------|------------------|
| Alimo-Metcalf B: A Critical Review of Leadership Theory. In: The Wiley-Blackwell Handbook of the Psychology of Leadership, Change, and Organizational Development. edn.: John Wiley & Sons; 2013: 13-47.    | Conceptual Paper |
| Zenouzi BN, Dehghan A: Complexity Theory and General Model of Leadership. Global Journal of Management 2012.                                                                                                | Conceptual Paper |
| Termeer C, Nooteboom SG: Complexity leadership for sustainable regional innovations. In: Leadership and Change in Sustainable Regional Development. edn. Edited by Sotarauta M, Horlings I, Liddle J; 2012. | Conceptual Paper |
| Terke_sli R: Chaos, Complexity and Police Leadership. In: Chaos, complexity and leadership edn.; 2012.                                                                                                      | Law Enforcement  |
| Stacey RD: Tools and techniques of leadership and management: Meeting the challenge of complexity; 2012.                                                                                                    | Conceptual Paper |
| Psychogios AG, Garev S: Understanding Complexity Leadership Behaviour In SMEs: Lessons From A Turbulent Business Environment. ECO, 2012.                                                                    | Industries       |
| Olmedo E: The future of leadership: The new complex leaders' skills. Academic Research 2012.                                                                                                                | Conceptual Paper |
| Neyiřci N, Potas N: New Leadership Paradigms in the Complexity Science. In: Chaos, Complexity and Leadership 2012. Edited by Banerjee S, Eręetin SSu: Springer Proceedings in Complexity 2012.              | Education        |
| Morpurgo S: Leadership and Complexity. In: Projects and Complexity. edn. Edited by Francesco Varanini WG; 2012: 215-234.                                                                                    | Conceptual Paper |
| Marion R, Rumsey MG: Organizational leadership and complexity mechanisms. In: Oxford Handbook of Leadership. Ed: 2012.                                                                                      | Conceptual Paper |
| Krisko A, Stiles E: Learning to trust in organisational complexity–A theoretical framework of complexity leadership and collaborative community theories. 2012.                                             | Conceptual Paper |
| Edson MC: A Complex Adaptive Systems View of Resilience in a Project Team. Systems Research and Behavioral Science 2012, 29(5):499-516.                                                                     | Education        |

|                                                                                                                                                                                                                                                               |                          |
|---------------------------------------------------------------------------------------------------------------------------------------------------------------------------------------------------------------------------------------------------------------|--------------------------|
| Bulutlar F, Kamaşak R: Complex Adaptive Leadership for Performance: A Theoretical Framework. In: Chaos, Complexity and Leadership. edn.; 2012.                                                                                                                | Conceptual Paper         |
| Brown BC, Center IS: Essentials of Applying Complexity Thinking for Sustainability Leadership. Retrieved May 2012.                                                                                                                                            | Conceptual Paper         |
| Antoniadis DN: Leadership Style and the Management of the Effects of Complexity. In: Chaos and Complexity Theory for Management: Nonlinear Dynamics. edn.; 2012.                                                                                              | Duplicate (Book Chapter) |
| Allen TW: Confronting Complexity and Creating Unity of Effort: The Leadership Challenge for Public Administrators. Public Administration Review 2012, 72(3):320-321.                                                                                          | Public Administration    |
| Uhl-Bien M, Marion R, McKelvey B: Complexity leadership theory: shifting leadership from the industrial age to the knowledge era (Ch 8). In: Leadership, Gender, and Organisation. edn.; 2011.                                                                | Conceptual Paper         |
| Ronn H: Complexity and leadership: Conceptual and competency implications. 2011.                                                                                                                                                                              | Conceptual Paper         |
| Robinson WT: Organizational Complexity and Leadership. 2011.                                                                                                                                                                                                  | Conceptual Paper         |
| Raghavendran S: Sensemaking of complexity: leadership in financial services. Journal of Business 2011.                                                                                                                                                        | Industries               |
| Morrison K: Leadership for self-organisation: complexity theory and communicative action. Journal of Complexity in Leadership 2011.                                                                                                                           | Conceptual Paper         |
| Marion R, Uhl-Bien M: Implications of complexity science for the study of leadership. In: The SAGE handbook of complexity and management. edn. Edited by Allen P, Maguire S, McKelvey B. Los Angeles, London, New Delhi, Singapore, Washington DC SAGE; 2011. | Conceptual Paper         |
| Lord RG, Hannah ST, Jennings PL: A framework for understanding leadership and individual requisite complexity. Organizational Psychology 2011.                                                                                                                | Conceptual Paper         |

|                                                                                                                                                                                                                                |                     |
|--------------------------------------------------------------------------------------------------------------------------------------------------------------------------------------------------------------------------------|---------------------|
| Kilburg RR, Donohue MD: Toward a “grand unifying theory” of leadership: Implications for consulting psychology. Consulting Psychology Journal: Practice and Research 2011, 63(1):6-25.                                         | Consulting          |
| Hill RM: Complexity Leadership: New Conceptions for Dealing with Soldier Suicides. Military Review 2011.                                                                                                                       | Law Enforcement     |
| Hazy JK: Parsing the 'influential increment 'in the language of complexity: Uncovering the systemic mechanisms of leadership influence. International Journal of Complexity in Leadership 2011.                                | Conceptual Paper    |
| Hannah ST, Lord RG, Pearce CL: Leadership and collective requisite complexity. Organizational Psychology 2011.                                                                                                                 | Conceptual Paper    |
| Gibson R: Rethinking the future: rethinking business, principles, competition, control, leadership, markets and the world 2011.                                                                                                | Conceptual Paper    |
| DeLia E: Complexity leadership in industrial innovation teams: a field study of leading, learning and innovating in heterogeneous teams. 2011.                                                                                 | Industries          |
| Dayton DK: Communicating organizational quality: A phenomenological study through the lenses of complexity leadership and organizational learning theories. 2011.                                                              | Inaccessible thesis |
| Bento F: A complex perspective towards leadership in academic departments: investigating organisational changes in a Norwegian research-intensive academic department. International Journal of Complexity in Leadership 2011. | Education           |
| Bento F: The contribution of complexity theory to the study of departmental leadership in processes of organisational change in higher education. International Journal of Complexity in Leadership 2011.                      | Education           |
| Woodhill J: Capacities for Institutional Innovation: A Complexity Perspective. IDS Bulletin 2010, 41(3):47-59.                                                                                                                 | Conceptual Paper    |
| Winkler, I: Contemporary leadership theories: Enhancing the understanding of the complexity, subjectivity and dynamic of leadership; 2010.                                                                                     | Conceptual Paper    |

|                                                                                                                                                                                       |                  |
|---------------------------------------------------------------------------------------------------------------------------------------------------------------------------------------|------------------|
| Sweetman D: Exploring the adaptive function in complexity leadership theory: An examination of shared leadership and collective creativity in innovation networks. 2010.              | Education        |
| Morrison K: Complexity theory, school leadership and management: questions for theory and practice. Educational Management Administration \& 2010.                                    | Education        |
| McKelvey B: Complexity leadership: the secret of Jack Welch's success. Journal of Complexity in Leadership and Management 2010. vol 1 N 1 2010                                        | Conceptual Paper |
| Lotrecchiano GR: Complexity leadership in transdisciplinary (TD) learning environments: A knowledge feedback loop. International journal of transdisciplinary research 2010, 5(1).    | Industries       |
| Kaiser RB, Overfield DV: Assessing flexible leadership as a mastery of opposites. Consulting Psychology Journal: Practice and Research 2010, 62(2):105-118.                           | Psychology       |
| Hazy JK: Complexity Thinking & Leadership: How Nonlinear Models of Human Organizing Dynamics Can Inform Management Practice. In: Adelphi University School of Business Working. 2010. | Conceptual Paper |
| Hannah ST, Jennings PL, Nobel OB-Y: Tactical military leader requisite complexity: Toward a referent structure. Military Psychology 2010, 22(4):412-449.                              | Law Enforcement  |
| Goldstein J, Hazy J, Lichtenstein B: Complexity and the nexus of leadership: Leveraging nonlinear science to create ecologies of innovation; 2010.                                    | Conceptual Paper |
| Davidson SJ: Complex responsive processes: a new lens for leadership in twenty-first-century health care. Nurs Forum 2010, 45(2):108-117.                                             | Conceptual Paper |
| Curlee W, Gordon RL: Leadership of Complexity-Driven Organizations. In: Complexity Theory and Project Management. edn.: John Wiley & Sons, Inc.; 2010: 239-254.                       | Conceptual Paper |



|                                                                                                                                                                                    |                        |
|------------------------------------------------------------------------------------------------------------------------------------------------------------------------------------|------------------------|
| Curlee W, Gordon RL: Virtual Leadership through Complexity. In: Complexity Theory and Project Management. edn.: John Wiley & Sons, Inc.; 2010: 117-134.                            | Conceptual Paper       |
| Uhl-Bien M, Marion R: Complexity leadership in bureaucratic forms of organizing: A meso model. The Leadership Quarterly 2009.                                                      | Conceptual Paper       |
| Sims BD: Complexity, adaptive leadership, phase transitions, and new emergent order: A case study of the Northwest Texas Conference of the United Methodist Church. 2009.          | Religious organisation |
| Pfaff H, Neumann M, Kuch C, Hammer A, Janssen C, Brinkmann A, Ommen O The basic principles of leadership. Z Evid Fortbild Qual Gesundheitswes 2009, 103(4):187-192.                | Conceptual Paper       |
| Nooteboom A, Termeer C: Sustainable transitions and complexity leadership. 2009.                                                                                                   | Conceptual Paper       |
| Newth J, Corner PD: Leadership in new ventures: complexity managed by teams. International Journal of Business 2009.                                                               | Industries             |
| Martinez S: Emergent Leadership, Linking complexity, cognitive processes, adaptability and Innovation. Crosscutting Issues in International Transformation 2009.                   | Law Enforcement        |
| Johannessen SO: The complexity turn in studies of organisations and leadership: relevance and implications. International Journal of Learning and change 2009.                     | Conceptual Paper       |
| Burchell J: The Practical Application of Transformational Theory Vs. Complexity Leadership Theory on the Challenges of Leading. Journal of Business & Leadership (2005-2012) 2009. | Industries             |
| Avolio BJ, Walumbwa FO, Weber TJ: Leadership: current theories, research, and future directions. Annu Rev Psychol 2009, 60:421-449.                                                | Conceptual Paper       |
| Velsor EV: A complexity perspective on leadership development. In: Complexity leadership, part 1. edn. Edited by Uhl-Bien M, Marion R; 2008.                                       | Conceptual Paper       |

|                                                                                                                                                                                                                              |                      |
|------------------------------------------------------------------------------------------------------------------------------------------------------------------------------------------------------------------------------|----------------------|
| Uhl-Bien M, Marion R, McKelvey B: Complexity leadership theory Shifting leadership from the industrial age to the knowledge era Chapter 8 . In: Complexity leadership: part 1. edn.; 2008.                                   | Conceptual Paper     |
| Uhl-Bien M: Complexity leadership : Part 1. USA Information aged publishing 2008.(Book)                                                                                                                                      | Conceptual Paper     |
| Sangvai D, Lyn M, Michener L: Defining high-performance teams and physician leadership. Physician Exec 2008, 34(2):44-51.                                                                                                    | Education            |
| McKelvey B: Emergent strategy via complexity leadership. In: Complexity and Leadership: Part I. edn. Edited by Bien MU; 2008.                                                                                                | Conceptual Paper     |
| Marion R: Complexity theory for organizations and organizational leadership. In: Complexity leadership, part 1. ed. Edited by Bien MU, Marion R. Charlotte North Carolina: Information Age Publishing; 2008.                 | Conceptual Paper     |
| Lauser B, Peters M: A complexity perspective on leadership and change in the post-merger integration process. International Journal of Learning and 2008.                                                                    | Industries           |
| Jackson PR, Leach DJ, Charles K: A longitudinal study of complexity leadership in empowered work teams. Available at SSRN 1508544 2008.                                                                                      | Industries           |
| Hazy JK: Toward a theory of leadership in complex systems: computational modeling explorations. Nonlinear Dynamics Psychol Life Sci 2008, 12(3):281-310.                                                                     | Conceptual Paper     |
| Hannah ST, Eggers JT, Peter LJ: Complex Adaptive Leadership: defining what constitutes effective leadership for complex organisational contexts. In: Knowledge-driven corporation: complex creative destruction. edn.; 2008. | Conceptual Paper     |
| Dooley KJ, Lichtenstein B: Research methods for studying the complexity dynamics of leadership. In: Complexity leadership part I.: edn. Edited by Uhl-Bien M; 2008.                                                          | Research Methodology |
| Clancy TR, Effken JA, Pesut D: Applications of complex systems theory in nursing education, research, and practice. Nursing outlook 2008, 56(5):248-256.e243.                                                                | Education            |

|                                                                                                                                                                                                                                                                             |                  |
|-----------------------------------------------------------------------------------------------------------------------------------------------------------------------------------------------------------------------------------------------------------------------------|------------------|
| Boyatzis RE: Leadership development from a complexity perspective. Consulting Psychology Journal: Practice and Research 2008, 60(4):298-313.                                                                                                                                | Psychology       |
| Uhl-Bien M, Marion R, McKelvey B: Complexity leadership theory: Shifting leadership from the industrial age to the knowledge era. The leadership quarterly 2007.                                                                                                            | Conceptual Paper |
| Sorlie S: A complex task: Creating models for responsible leadership. Leadership in Action 2007, 27(1):21-23.                                                                                                                                                               | Industries       |
| Simpson P: Organizing in the mist: a case study in leadership and complexity. Leadership & Organization Development Journal 2007.                                                                                                                                           | Psychology       |
| Moody RC, Horton-Deutsch S, Pesut DJ: Appreciative inquiry for leading in complex systems: supporting the transformation of academic nursing culture. J Nurs Educ 2007, 46(7):319-324.                                                                                      | Education        |
| Marion R, Uhl-Bien M: Introduction to Leadership Quarterly Special Issue on Leadership and Complexity. 2007.                                                                                                                                                                | Conference paper |
| Marion R, Uhl-Bien M: Complexity and strategic leadership. In: Monographs in leadership and management volume 4 : being there even when you are not : leading through strategy, structures and systems Edited by Hooijberg R, Hunt JGJ, Antonakis J, Boal KB, Lane N; 2007. | Conceptual Paper |
| Lichtenstein BB, Uhl-Bien M, Marion R, Seers A, Orton JD, Schreiber C: Complexity leadership theory: An interactive perspective on leading in complex adaptive systems. 2006.                                                                                               | Conceptual Paper |
| Kezar AJ, Carducci R, McGavin MC: Complexity and Chaos Theory. In: Rethinking the "L" Word in Higher Education: the revelation of research on leadership Volume 31, edn.: Wiley Subscription Services, Inc., A Wiley Company; 2006: 1-218.                                  | Education        |
| Goldstein JA, Hazy JK: Editorial introduction to the special issue: From complexity to leadership and back to complexity. Emergence-Mahwah- 2006.                                                                                                                           | Editorial        |

|                                                                                                                                                              |                   |
|--------------------------------------------------------------------------------------------------------------------------------------------------------------|-------------------|
| Christensen NL: The leadership challenges of complexity and uncertainty in environmental science. Leader to Leader 2006, 2006(S1):20-23.                     | Environment       |
| Souba WW: New ways of understanding and accomplishing leadership in academic medicine. J Surg Res 2004, 117(2):177-186.                                      | Clinical practice |
| Marion R, Uhl-Bien M: Complexity theory and Al-Qaeda: Examining complex leadership. Emergence 2003.                                                          | Terrorism         |
| Avolio BJ, Sosik JJ, Jung DI, Berson Y: Leadership Models, Methods, and Applications. In: Handbook of Psychology. Ed John Wiley & Sons, Inc.; 2003: 277-308. | Conceptual Paper  |
| Poley JK: Leadership. New Directions for Higher Education 2001, 2001(115):83-93.                                                                             | Education         |
| Marion R, Uhl-Bien M: Leadership in complex organizations; 2001.                                                                                             | Conceptual paper  |
