# Supplementary material for: Complex Leadership in Healthcare: A Scoping Review
Source: PubMed Central journal article supplement (PMC6358662; doi:10.15171/ijhpm.2018.75), 2018-09-01
Supplement: ijhpm-7-1073-s003.pdf [file ijhpm-7-1073-s003.pdf]

**Supplementary file 3. Measurement and Interpretation of Kappa Coefficient**

**Table 1.** Degree of Agreement Between Two Reviewers

|                   | <b>Reviewer 2 Reject</b> | <b>Reviewer 2 Accept</b> | <b>Total</b> |
|-------------------|--------------------------|--------------------------|--------------|
| Reviewer 1 Reject | 62                       | 4                        | 66           |
| Reviewer 1 Accept | 5                        | 13                       | 18           |
| <b>Total</b>      | <b>67</b>                | <b>17</b>                | <b>84</b>    |

**Table 2.** Measurement of Kappa Coefficient

| <b>(P0)</b> | <b>Observed Agreement</b> | <b>(PE)</b><br><b>Expected Agreement</b> | <b>K</b>     | <b>se(K)</b> | <b>Lower 95% CI</b> | <b>Upper 95% CI</b> |
|-------------|---------------------------|------------------------------------------|--------------|--------------|---------------------|---------------------|
| 0.893       |                           | 0.670                                    | <b>0.675</b> | 0.102        | <b>0.475</b>        | <b>to 0.876</b>     |

**Table 3.** Interpretation of Kappa Coefficient

| <b>Interpretation</b> | <b>Strength of agreement</b> |
|-----------------------|------------------------------|
| <b>Value of K</b>     |                              |
| <0.20                 | Poor                         |
| 0.21 - 0.40           | Fair                         |
| 0.41 - 0.60           | Moderate                     |
| 0.61 - 0.80           | Good                         |
| 0.81 - 1.00           | Very good                    |
