# Supplementary material for: Complex Leadership in Healthcare: A Scoping Review
Source: PubMed Central journal article supplement (PMC6358662; doi:10.15171/ijhpm.2018.75), 2018-09-01
Supplement: ijhpm-7-1073-s006.pdf [file ijhpm-7-1073-s006.pdf]

**Supplementary file 6.** Categorization Criteria of Included Papers

| Author                         | CAS | Situational | Comprehensive |
|--------------------------------|-----|-------------|---------------|
| (Anderson and McDaniel, 2000)  | 1   | 0           | 1             |
| (Burns, 2001)                  | 1   | 1           | 1             |
| (Plsek and Wilson, 2001b)      | 1   | 1           | 0             |
| (Minas, 2005)                  | 1   | 1           | 0             |
| (Penprase and Norris, 2005)    | 1   | 0           | 0             |
| (Forbes-Thompson et al., 2007) | 1   | 0           | 0             |
| (Ford, 2009)                   | 1   | 1           | 0             |
| (Chadwick, 2010)               | 1   | 0           | 1             |
| (Davidson, 2010)               | 0   | 1           | 1             |
| (Gonnering, 2010)              | 1   | 1           | 1             |
| (Hanson and Ford, 2010)        | 1   | 0           | 1             |
| (Martin, 2010)                 | 0   | 0           | 1             |
| (Ott, 2010)                    | 1   | 0           | 1             |
| (Price, 2011)                  | 0   | 1           | 0             |
| (Bailey et al., 2012)          | 1   | 1           | 0             |
| (McCarthy, 2012)               | 0   | 1           | 1             |
| (Sturmberg and Martin, 2012)   | 1   | 0           | 0             |
| (Weberg, 2012)                 | 1   | 1           | 1             |
| (Corazzini et al., 2013)       | 1   | 1           | 0             |
| (Lindstrom, 2013)              | 1   | 1           | 0             |
| (Weberg, 2013)                 | 1   | 0           | 1             |
| (Cohn, 2014)                   | 1   | 1           | 0             |
| (Gilson et al., 2014)          | 1   | 0           | 0             |
| (Prashanth et al., 2014)       | 0   | 0           | 0             |
| (Viitala, 2014)                | 0   | 1           | 1             |
| (Anderson et al., 2015)        | 1   | 1           | 0             |
| (Crowell, 2015)                | 1   | 1           | 1             |
| Grady 2015 (Grady, 2015)       | 1   | 0           | 0             |
| (Kwamie et al., 2015)          | 1   | 0           | 0             |
| (Linderman et al., 2015)       | 1   | 1           | 0             |
| (McKimm and Till, 2015)        | 1   | 0           | 0             |
| (Porter-O'Grady, 2015)         | 1   | 0           | 0             |

|                            |   |   |   |
|----------------------------|---|---|---|
| (Prescott and Rowe, 2015)  | 1 | 0 | 0 |
| (Arena and Uhl-Bien, 2016) | 1 | 0 | 1 |
| (Howard, 2016)             | 1 | 0 | 0 |
| (Miller, 2016)             | 1 | 0 | 1 |
| (Weberg, 2016)             | 1 | 0 | 1 |
